# Supplementary material for: Air quality observations onboard commercial and targeted Zeppelin flights in Germany – a platform for high-resolution trace-gas and aerosol measurements within the planetary boundary layer
Source: Copernicus journal article supplement (doi:10.5194/amt-15-3827-2022), 2022-06-27
Supplement: Supplementary file 1 [file amt-15-3827-2022-supplement.pdf]

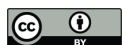

*Supplement of*

**Air quality observations onboard commercial and targeted Zeppelin flights in Germany – a platform for high-resolution trace-gas and aerosol measurements within the planetary boundary layer**

**Ralf Tillmann et al.**

*Correspondence to:* Ralf Tillmann (r.tillmann@fz-juelich.de)

The copyright of individual parts of the supplement might differ from the article licence.

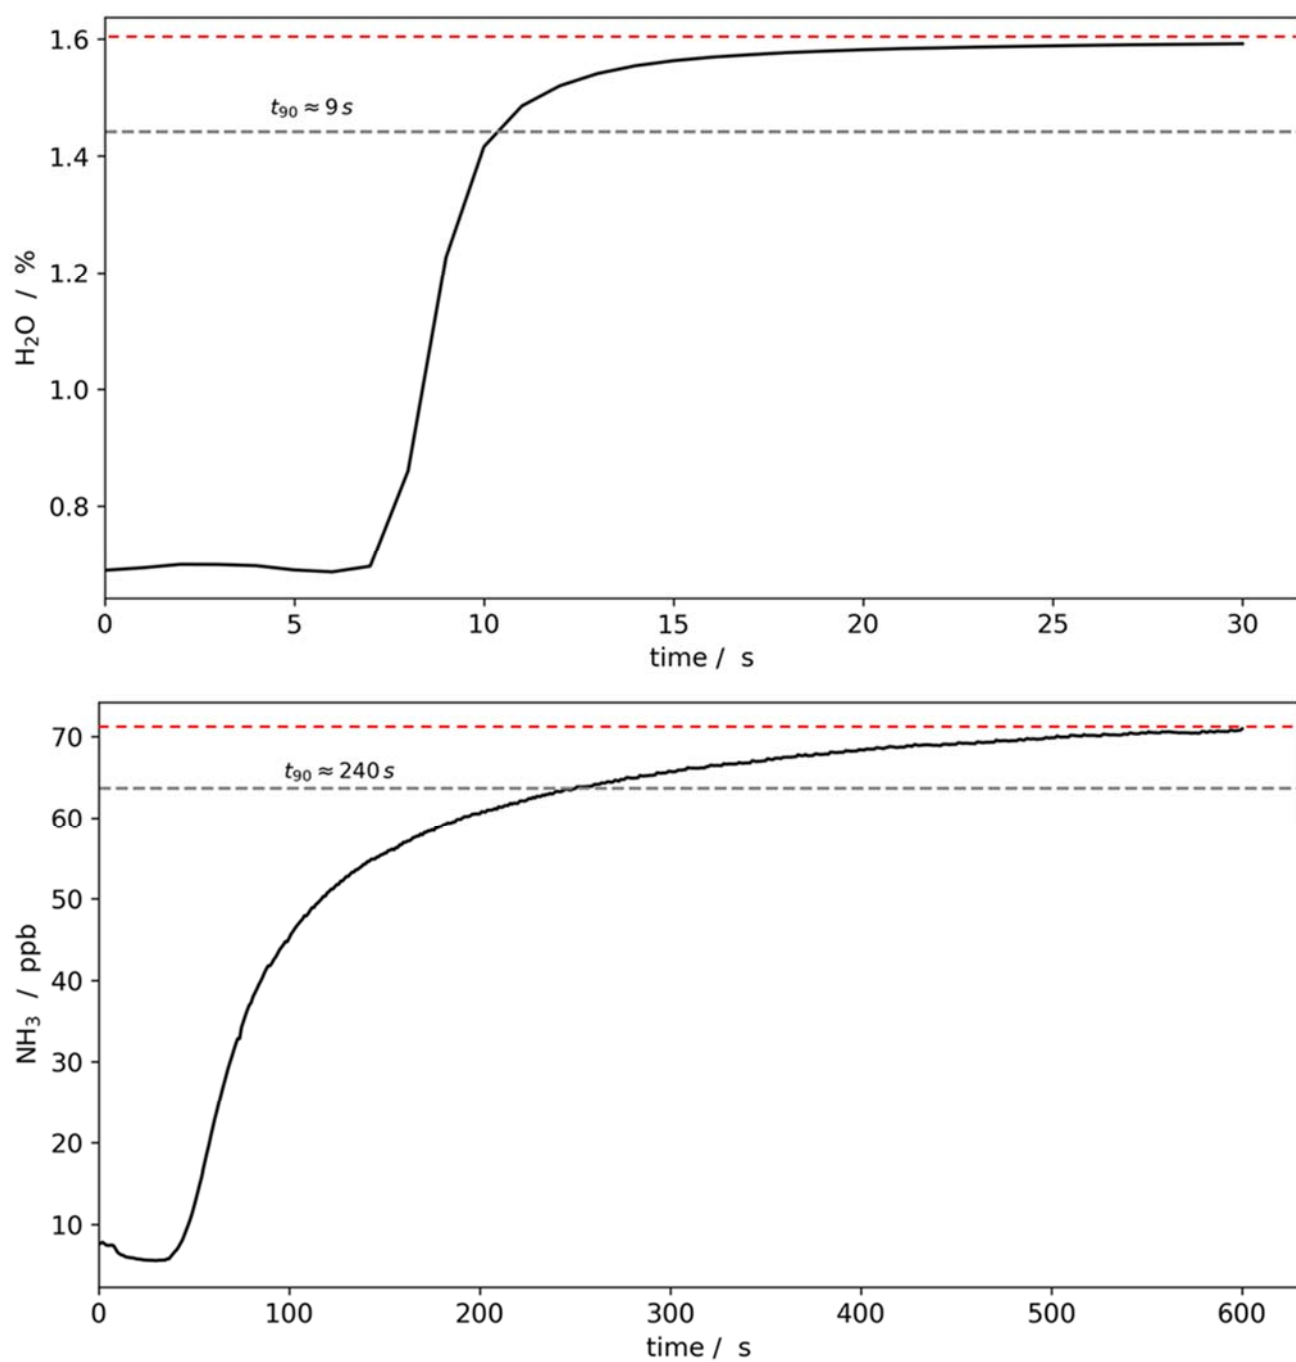

**Figure S1:** MIRO response times for H<sub>2</sub>O and NH<sub>3</sub>. The red horizontal line indicates the set value.

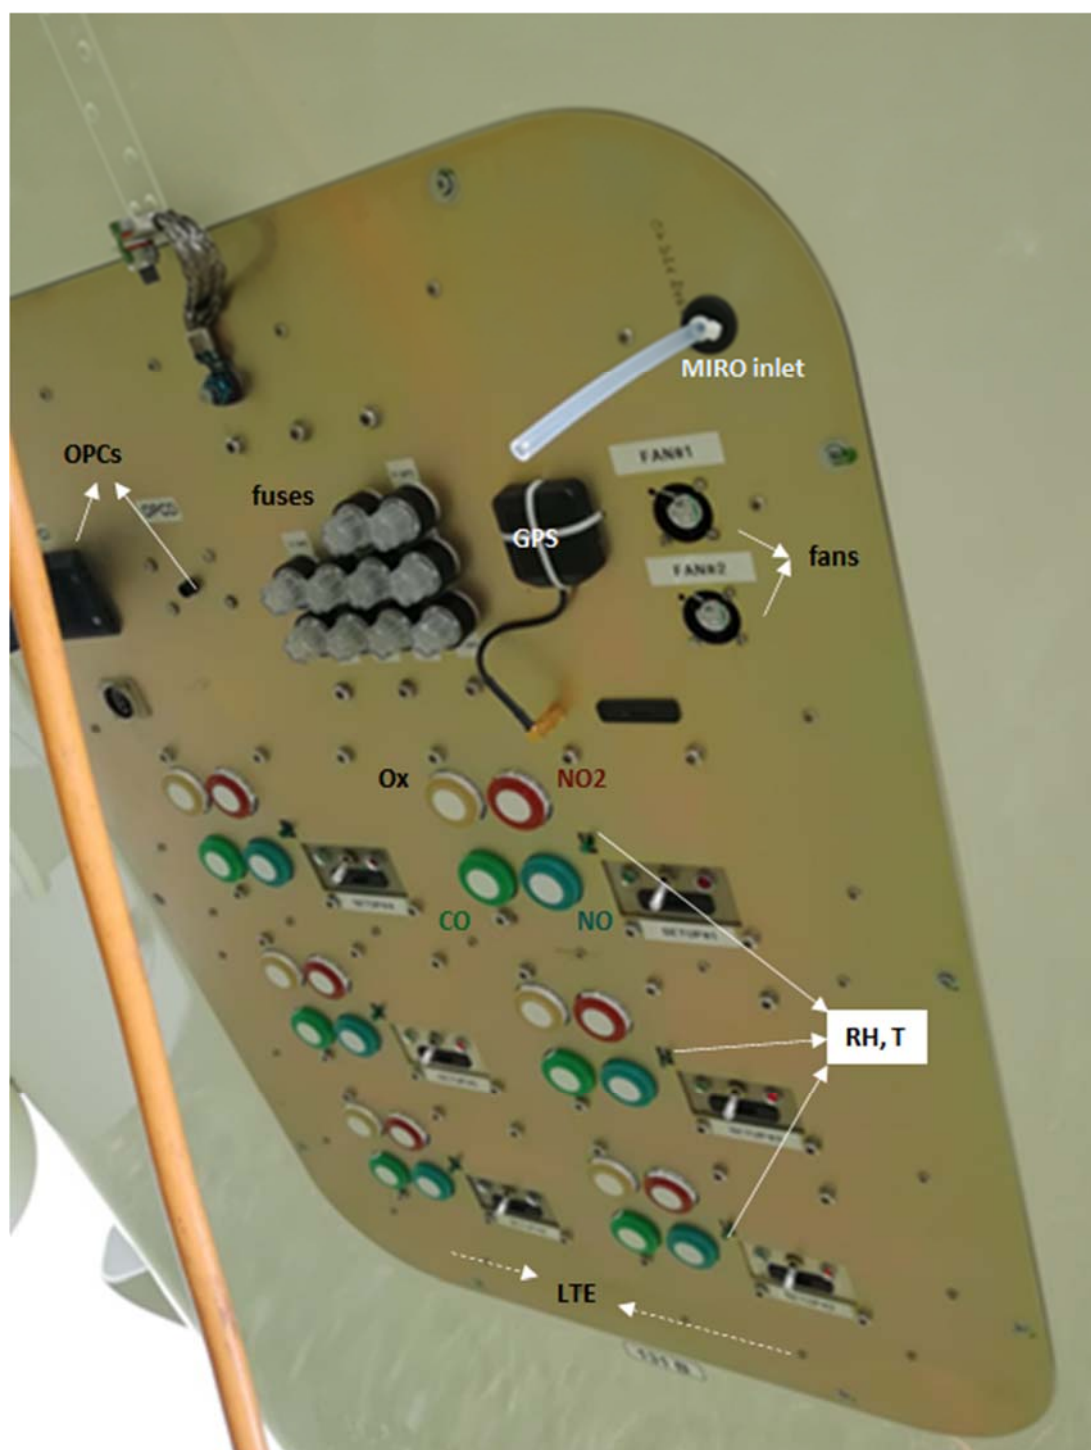

**Figure S2:** Hatch box setup. Only the location of the LTE antennas is included in this picture with dashed lines.

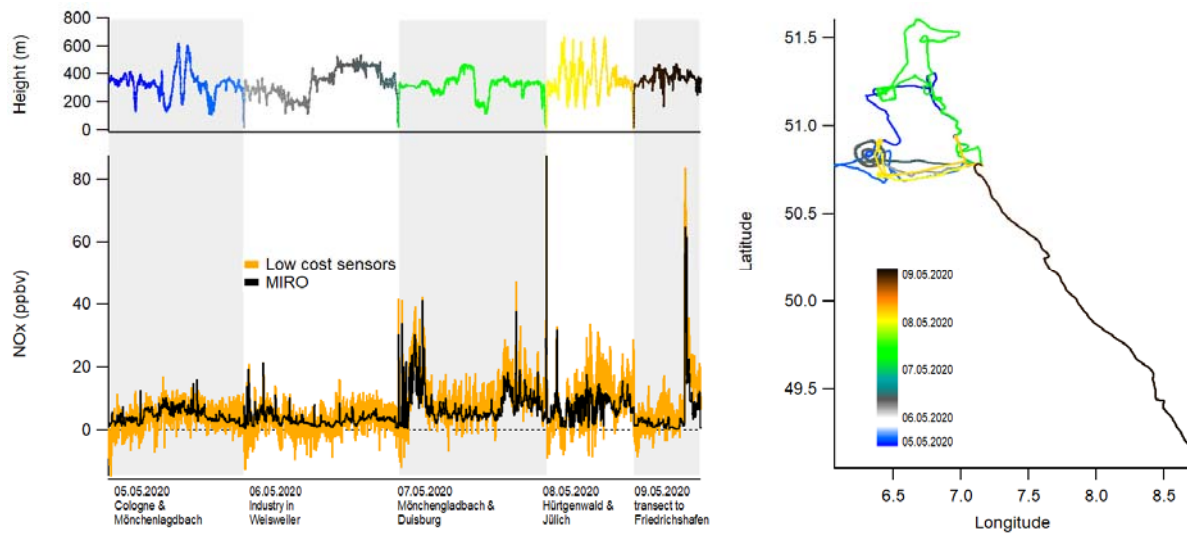

**Figure S3:** Timeseries of  $\text{NO}_x$  mixing ratios for the low-cost sensors and the MIRO as well as the height of the Zeppelin measurements for 5 flight days. On the right, the location of these measurements is also provided.

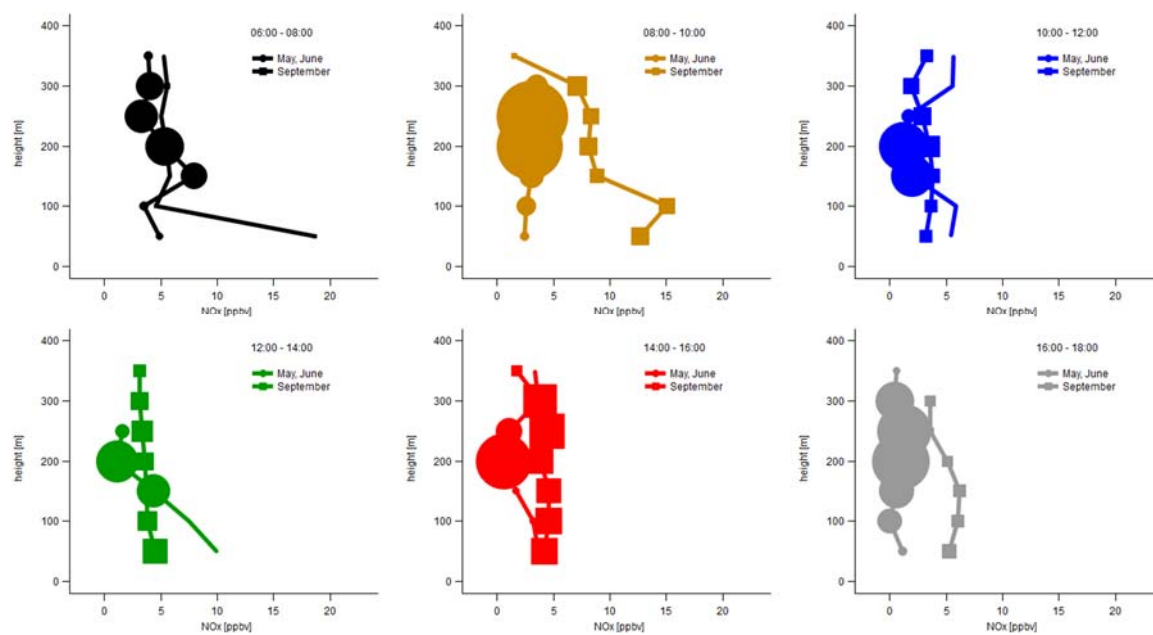

**Figure S4:** Vertical distribution of pollutants in Bonn during different seasons. Size indicates the number of data points included in each marker.

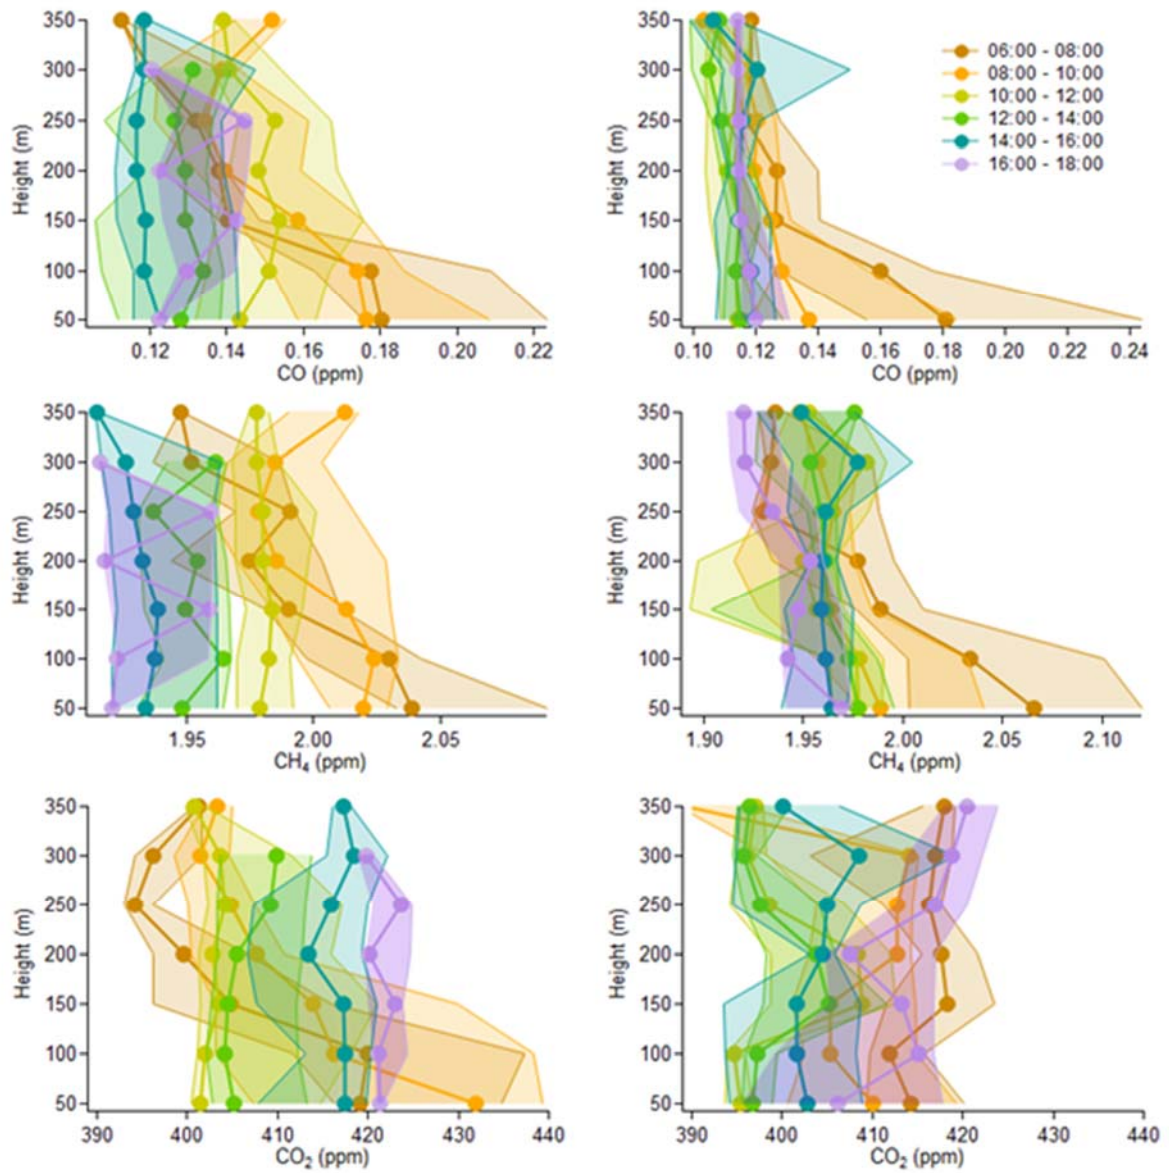

**Figure S5:** Vertical distribution of pollutants in Frankfurt (left) and Bonn (right) at different time intervals.

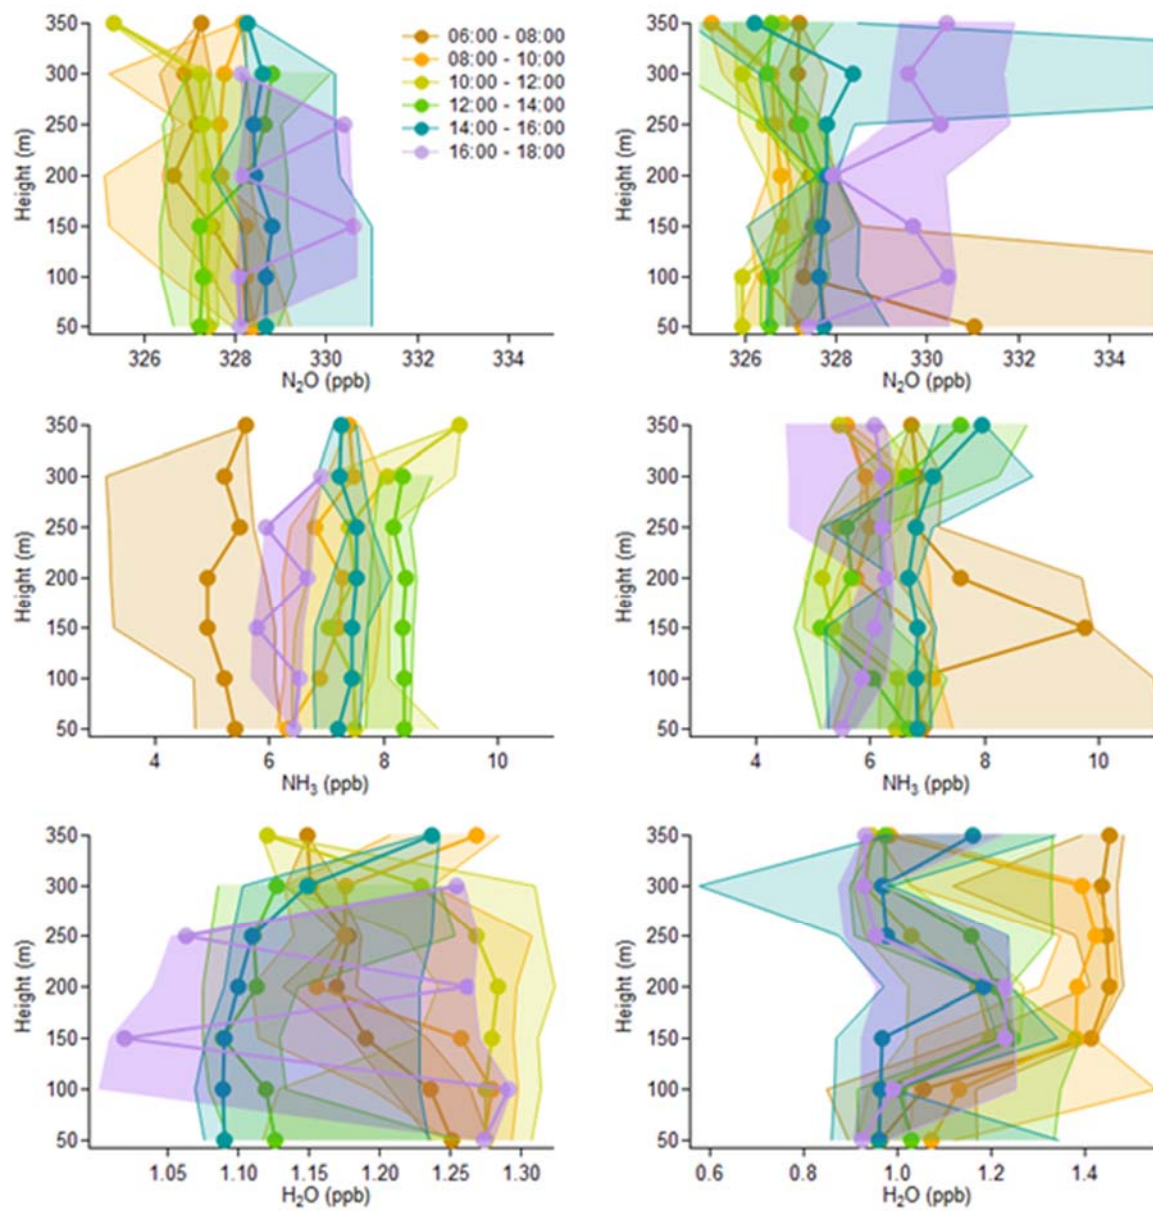

**Figure S6:** Vertical distribution of pollutants in Frankfurt (left) and Bonn (right) at different time intervals.

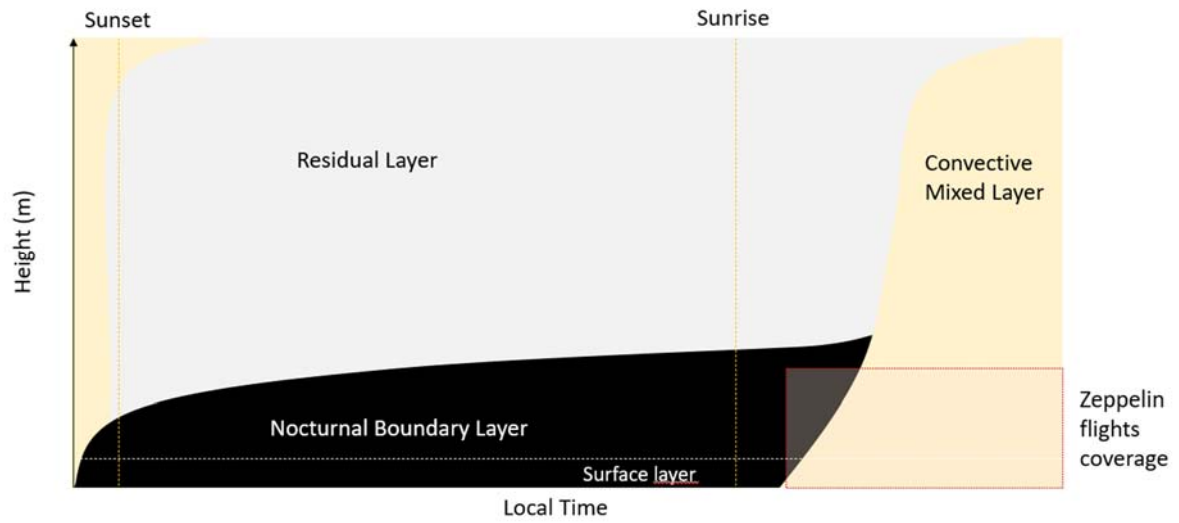

**Figure S7:** Qualitative representation of the planetary boundary layer dynamics during the Zeppelin flights (Stull 1988).

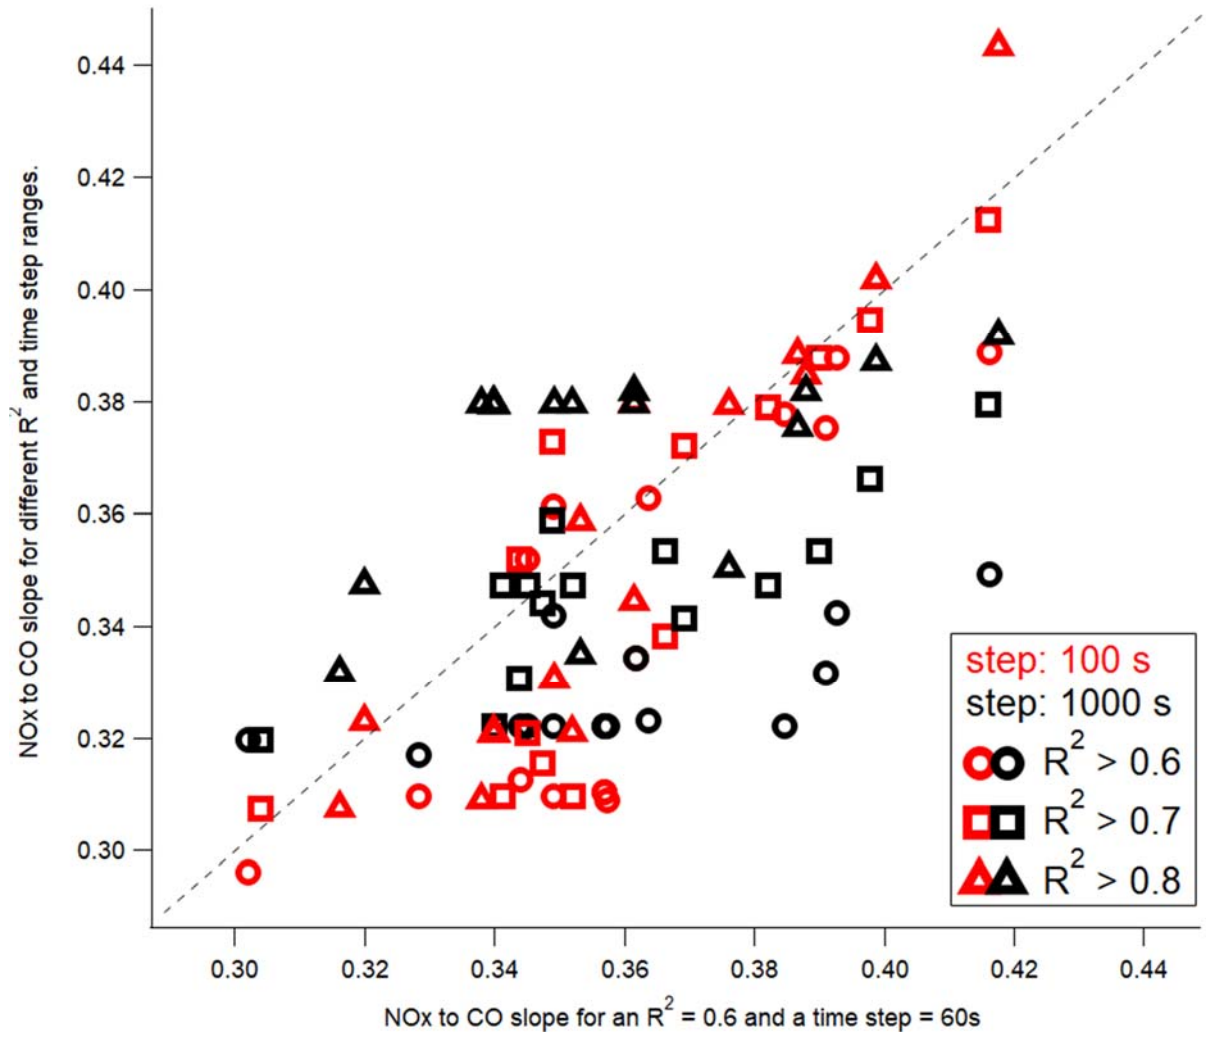

**Figure S8:** Sensitivity analysis for the  $\text{NO}_x$  to CO slope calculations during the Zeppelin flights based on the goodness of the fit indicated by the  $R^2$  and the time step chosen to fit the  $\text{NO}_x$  and CO data.

**Table S1:** Ground-based monitoring stations. Details on the data retrieval can be found here:  
<https://www.umweltbundesamt.de/daten/luft/luftdaten/stationen> (last visited: 2021/10/14).

| EEA code | Latitude [°N] | Longitude [°E] | Station Names                | Station Type | Station Area |
|----------|---------------|----------------|------------------------------|--------------|--------------|
| DEHE005  | 50.1017       | 8.54252        | Frankfurt-Höchst             | background   | urban        |
| DEHE150  | 50.1133       | 8.59426        | Frankfurt-Niedwald           | background   | urban        |
| DEHE008  | 50.12533      | 8.74634        | Frankfurt-Ost                | background   | urban        |
| DEHE135  | 50.0755       | 8.57631        | Frankfurt-Schwanheim         | background   | urban        |
| DEHE011  | 50.1358       | 8.92157        | Hanau                        | background   | urban        |
| DEHE018  | 50.0103       | 8.4515         | Raunheim                     | background   | urban        |
| DEHE022  | 50.0503       | 8.24495        | Wiesbaden-Süd                | background   | urban        |
| DEHE041  | 50.1246       | 8.69191        | Frankfurt-Friedb. Landstr.   | traffic      | urban        |
| DEHE116  | 50.1014       | 8.78489        | Offenbach-Untere Grenzstr.   | traffic      | urban        |
| DEHE037  | 50.0772       | 8.23032        | Wiesbaden-Ringkirche         | traffic      | urban        |
| DEHE112  | 50.0721       | 8.22887        | Wiesbaden-Schiersteiner Str. | traffic      | urban        |
| DEHE052  | 50.2219       | 8.44608        | Kleiner Feldberg             | background   | rural        |
